# Supplementary material for: Postprandial glycemic and circulating SCFA concentrations following okara- and biovalorized okara-containing biscuit consumption in middle-aged and older adults: a crossover randomized controlled trial
Source: Royal Society of Chemistry journal article supplement (doi:10.1039/d2fo00526c), 2022-01-01
Supplement: d2fo00526c1.pdf [file d2fo00526c1.pdf]

**Table S1 baseline diet data of participants prior to each intervention.**

| Nutrient                        | C          | RO         | AOK        | <i>p</i> |
|---------------------------------|------------|------------|------------|----------|
| Energy (kcal)                   | 1732 ± 99  | 1701 ± 99  | 1665 ± 99  | 0.632    |
| Fats (g)                        | 68.6 ± 5.4 | 66.3 ± 5.4 | 67.5 ± 5.4 | 0.881    |
| Saturated fatty acids (g)       | 24.9 ± 2.5 | 23.7 ± 2.5 | 26.2 ± 2.5 | 0.526    |
| Monounsaturated fatty acids (g) | 24.7 ± 2.2 | 24.6 ± 2.2 | 23.5 ± 2.2 | 0.797    |
| Polyunsaturated fatty acids (g) | 14.5 ± 1.2 | 13.6 ± 1.2 | 13.6 ± 1.2 | 0.642    |
| Cholesterol (mg)                | 293 ± 46   | 322 ± 46   | 322 ± 46   | 0.452    |
| Protein (g)                     | 76.1 ± 6.4 | 80.5 ± 6.4 | 74.6 ± 6.4 | 0.258    |
| Total carbohydrates (g)         | 211 ± 12   | 205 ± 12   | 204 ± 12   | 0.837    |
| Available carbohydrates (g)     | 193 ± 12   | 185 ± 12   | 185 ± 12   | 0.765    |
| Total sugar (g)                 | 58.5 ± 5.7 | 53.5 ± 5.7 | 55.5 ± 5.7 | 0.738    |
| Dietary fiber (g)               | 20.8 ± 2.0 | 20.7 ± 2.0 | 19.5 ± 2.0 | 0.722    |
| Insoluble dietary fiber (g)     | 14.7 ± 1.5 | 15.3 ± 1.5 | 13.8 ± 1.5 | 0.605    |
| Soluble dietary fiber (g)       | 5.8 ± 0.5  | 4.9 ± 0.5  | 5.2 ± 0.5  | 0.220    |
| Sodium (mg)                     | 2655 ± 322 | 2857 ± 322 | 2424 ± 322 | 0.178    |
| Calcium (mg)                    | 648 ± 65   | 626 ± 65   | 588 ± 65   | 0.626    |

Values presented as mean ± standard error. All statistical tests done by linear mixed effect model, paired with post-hoc Tukey HSD test. AOK – autoclaved okara flour substituted biscuits; C – control biscuits; RO – biovalorized okara flour-substituted biscuits.

**Table S2 iAUC and AUC values not provided in the journal article.**

| Biomarker                                         | C                                | RO                               | AOK                             | <i>p</i> |
|---------------------------------------------------|----------------------------------|----------------------------------|---------------------------------|----------|
| Glucose AUC (mmol/L · min) <sup>1</sup>           | 1344 (1251, 1437) <sup>b</sup>   | 1569 (1475, 1662) <sup>a</sup>   | 1475 (1381, 1568) <sup>ab</sup> | 0.005    |
| Insulin iAUC (mIU/L · min) <sup>1</sup>           | 10260 (7020, 13499) <sup>a</sup> | 8911 (5672, 12151) <sup>ab</sup> | 8707 (5467, 11946) <sup>b</sup> | 0.028    |
| Insulin AUC (mIU/L · min) <sup>1</sup>            | 10246 (6483, 14009)              | 13576 (9813, 17339)              | 11420 (7657, 15183)             | 0.450    |
| Acetic acid iAUC (μmol/L · min) <sup>2</sup>      | 1447 (-308, 3202)                | 2510 (456, 4564)                 | 2405 (32, 4778)                 | 0.080    |
| Propionic acid iAUC (μmol/L · min) <sup>2</sup>   | 753 (246, 1260)                  | 1145 (664, 1626)                 | 1329 (752, 1906)                | 0.214    |
| Butyric acid iAUC (μmol/L · min) <sup>2</sup>     | 76 (32, 121)                     | 104 (31, 178)                    | 47 (21, 74)                     | 0.127    |
| Total serum SCFA iAUC (μmol/L · min) <sup>2</sup> | 1782 (-377, 3941) <sup>b</sup>   | 3280 (823, 5737) <sup>a</sup>    | 3246 (430, 6062) <sup>ab</sup>  | 0.063    |
| Acetic acid AUC (μmol/L · min) <sup>2</sup>       | 14617 (11745, 17489)             | 15850 (12745, 18955)             | 16855 (13869, 19841)            | 0.127    |
| Propionic acid AUC (μmol/L · min) <sup>2</sup>    | 4318 (3723, 4913)                | 4581 (4073, 5089)                | 4804 (4282, 5326)               | 0.074    |
| Butyric acid AUC (μmol/L · min) <sup>2</sup>      | 320 (252, 388)                   | 342 (275, 409)                   | 266 (233, 299)                  | 0.127    |
| Total serum SCFA AUC (μmol/L · min) <sup>2</sup>  | 19234 (16116, 22352)             | 20773 (17359, 24187)             | 21924 (18540, 25308)            | 0.091    |
| TC iAUC (mmol/L · min) <sup>2</sup>               | 6.0 (0.2, 11.8)                  | 5.7 (0.8, 10.7)                  | 8.8 (1.5, 16.0)                 | 0.563    |
| HDL-C iAUC (mmol/L · min) <sup>2</sup>            | 5.9 (0.4, 11.3)                  | 2.0 (0.6, 3.4)                   | 2.1 (-0.3, 4.5)                 | 0.482    |
| LDL-C iAUC (mmol/L · min) <sup>2</sup>            | 0.1 (-0.1, 0.3)                  | 1.2 (0.1, 2.2)                   | 1.1 (0.0, 2.2)                  | 0.122    |
| TC AUC (mmol/L · min) <sup>2</sup>                | 1192 (1039, 1345)                | 1233 (1081, 1385)                | 1198 (1057, 1339)               | 0.177    |
| HDL-C AUC (mmol/L · min) <sup>1</sup>             | 339 (266, 413)                   | 346 (272, 419)                   | 335 (261, 408)                  | 0.369    |
| LDL-C AUC (mmol/L · min) <sup>1</sup>             | 654 (524, 784)                   | 681 (551, 811)                   | 677 (546, 807)                  | 0.451    |
| TG AUC (mmol/L · min) <sup>2</sup>                | 423 (302, 544)                   | 432 (312, 552)                   | 393 (282, 504)                  | 0.129    |

Values presented as mean (95% CI). Different alphabet superscript indicates a significant difference across the comparisons within the same row. Superscript a indicates the highest group across the row. Superscript 1 indicates statistical test done by linear mixed effect model, paired with post-hoc Tukey HSD test. Superscript 2 indicates statistical test done by non-parametric Friedman test and Wilcoxon signed rank test with Bonferroni *p* adjustment. AOK – autoclaved okara flour substituted biscuits; AUC – area under curve; C – control biscuits; HDL-C – high-density lipoprotein cholesterol; iAUC – incremental area under curve; LDL-C – low-density lipoprotein cholesterol; RO – biovalorized okara flour-substituted biscuits; SCFA – short-chain fatty acids; TC – total cholesterol; TG – triglyceride.
